# Supplementary material for: Carbon nanospikes grown on metal wires as microelectrode sensors for dopamine
Source: Royal Society of Chemistry journal article supplement (doi:10.1039/c5an01467k), 2015-01-01
Supplement: c5an01467k1.pdf [file c5an01467k1.pdf]

Supplemental Information for

Carbon Nanospikes Grown on Metal Wires as Microelectrode Sensors for Dopamine

Alexander G. Zestos<sup>1</sup>, Cheng Yang<sup>1</sup>, Christopher B. Jacobs<sup>1</sup>, Dale Hensley<sup>2</sup>, and B. Jill Venton<sup>1\*</sup>

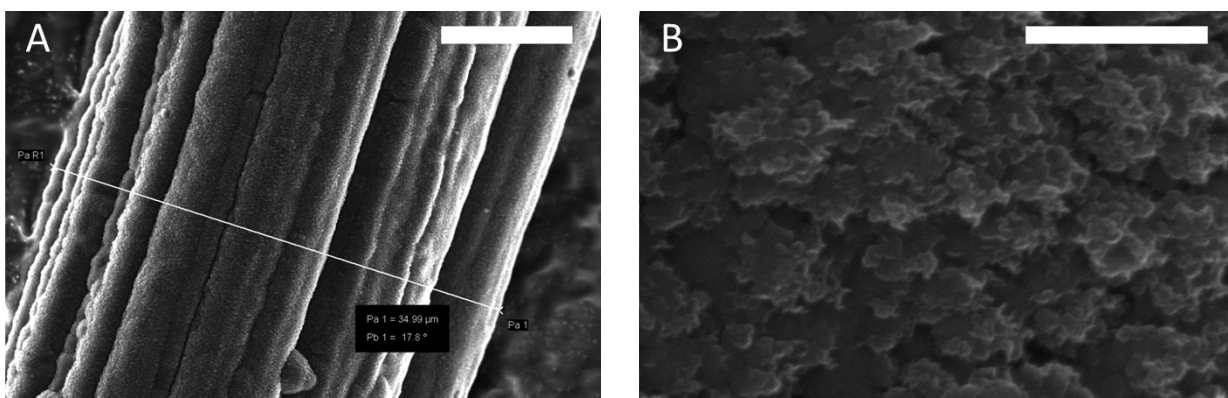

**Figure S1.** SEM images of A. CNS coated Ta wire (15 min growth time) with the diameter of 35  $\mu\text{m}$  (scale bar: 10  $\mu\text{m}$ ) and B. high magnification on the same sample shows larger features than the 7.5 min growth (scale bar: 300 nm).
